# Supplementary material for: Chronic Hypoperfusion is not Associated with Cerebral Amyloidosis
Source: Research Square preprint supplement (doi:10.21203/rs.3.rs-104777/v1), 2020-11-13
Supplement: Supplementary file 1 [file 573d056e82ea7604cdf19a52.docx]

**Table 1 Characteristics of the study subjects**

| Case No. | Age | Sex | *APOE* ε4 genotype | Hypoperfusion responsible vessels | Diagnosis | SUVRs | MMSE  (education level) | CDR |
| --- | --- | --- | --- | --- | --- | --- | --- | --- |
| 1 | 68 | female | ε2/ε3 | right ICA stenosis (60%) | TIA | 1.09 | 26 (6) | 0 |
| 2 | 76 | male | ε3/ε3 | Left frontal patchy hypoperfusion without obvious large vessel stenosis | TIA | 1.07 | 29 (12) | 0 |
| 3 | 55 | female | ε3/ε3 | Left MCA occlusion | TIA | 1.09 | 28 (12) | 0 |
| 4 | 65 | male | ε3/ε4 | Left ICA occlusion | minor stroke (left frontal and parietal lobe) | 1.63 | 26 (6) | 0 |
| 5 | 60 | male | ε3/ε3 | right MCA severe stenosis (90%) | TIA | 1.01 | 29 (6) | 0 |
| 6 | 47 | male | ε3/ε3 | Left MCA occlusion | TIA | 0.84 | 29 (9) | 0 |
| 7 | 60 | female | ε3/ε3 | Left ICA occlusion | TIA | 0.91 |  | 0 |
| 8 | 75 | female | ε3/ε4 | right MCA severe stenosis (90%) | TIA, minor stroke (right temporal lobe) | 1.17 | 27 (9) | 0 |
| 9 | 64 | female | ε3/ε4 | Left MCA occlusion | TIA | 1.13 | 25 (0) | 0 |
| 10 | 64 | female | ε3/ε3 | Left MCA occlusion | TIA, minor stroke (left parietal and occipital lobe) | 1.10 | 26 (9) | 0 |

Abbreviations: MMSE, Mini-Mental State Examination; TIA, transient ischemic attack; ICA, internal carotid artery; MCA, middle cerebral artery.
